# Supplementary material for: Photoinduced electron-transfer processes of carbon nanohorns with covalently linked pyrene chromophores: charge-separation and electron-migration systems
Source: Royal Society of Chemistry journal article supplement (doi:10.1039/b618948b), 2007-01-01
Supplement: b618948b.pdf [file b618948b.pdf]

**Supporting Information**

**Photoinduced Electron-Transfer Processes of Carbon Nanohorns with Covalently  
Linked Pyrene Chromophores: Charge-Separation and Electron-Migration Systems**

*Atula S. D. Sandanayaka,<sup>a</sup> Georgia Pagona,<sup>b</sup> Jing Fan,<sup>c</sup> Nikos Tagmatarchis,<sup>\*b</sup> Masako  
Yudasaka,<sup>c</sup> Sumio Iijima,<sup>c</sup> Yasuyuki Araki,<sup>a</sup> Osamu Ito<sup>\* a</sup>*

<sup>a</sup>Institute of Multidisciplinary Research for Advanced Materials, Tohoku University,  
Katahira, Aoba-ku, Sendai, 980-8577 Japan.

<sup>b</sup>Theoretical and Physical Chemistry Institute, National Hellenic Research Foundation, 48  
Vass. Constantinou Ave., Athens 116 35, Greece.

<sup>c</sup>Fundamental and Environmental Research Laboratories, NEC Corporation, and, SORST-  
JST 34 Miyukigaoka, Tsukuba, Ibaraki 305-850, Japan.

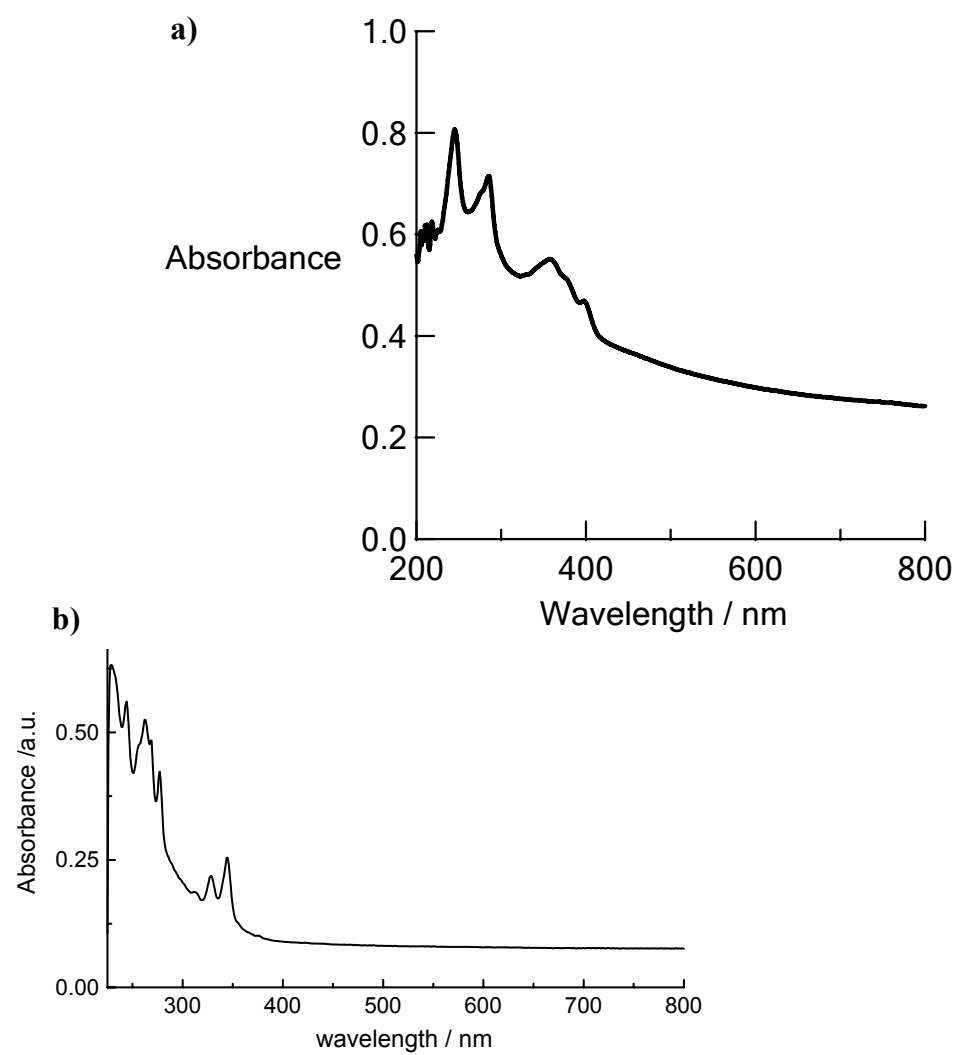

**Figure S1:** Electronic absorption spectra of a) nanohybrid 2 and b) nanohybrid 3.

a)

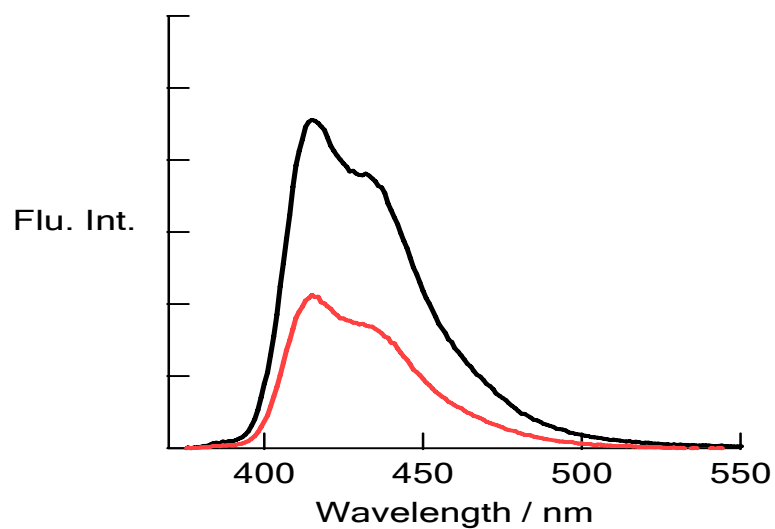

b)

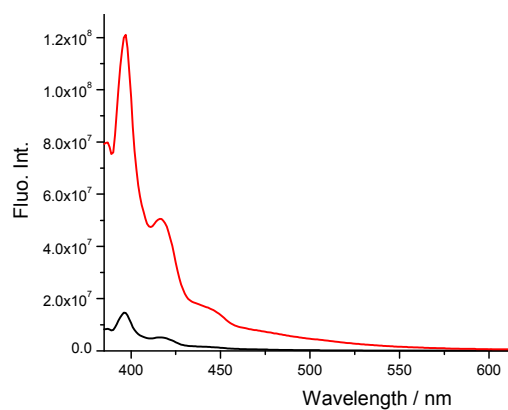

**Figure S2:** Steady-state fluorescence spectra of a) pyrene amine (black) and nanohybrid **2** (red) at  $\lambda_{\text{exc.}} = 360$  nm, and b) pyrene butanol (red) and nanohybrid **3** (black) at  $\lambda_{\text{exc.}} = 350$  nm.

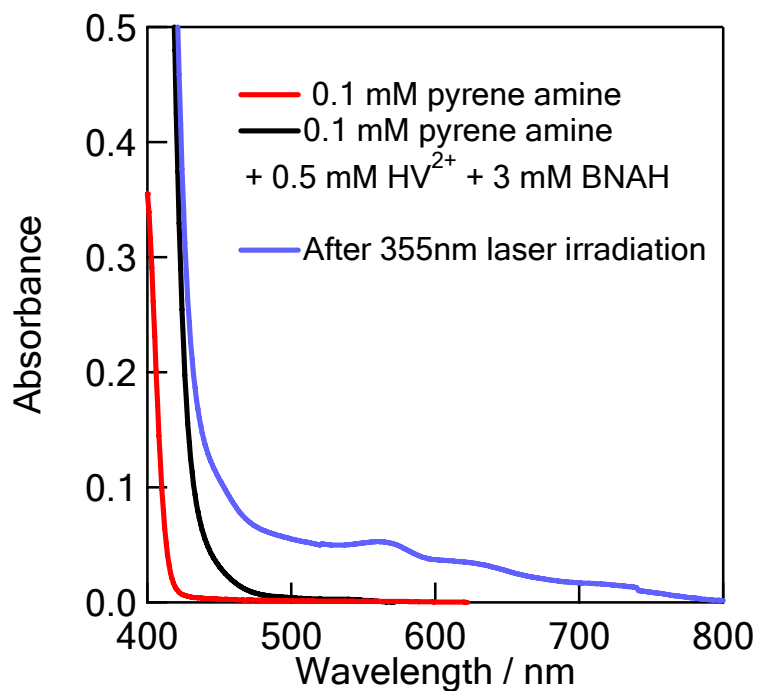

**Figure S3:** Steady-state absorption spectral changes of pyrene amine in the presence of 0.5 mM HV<sup>2+</sup> and BNAH before and after repeated 355-nm laser light irradiation (ca. 3 mJ/pulse) in deaerated CH<sub>2</sub>Cl<sub>2</sub>.

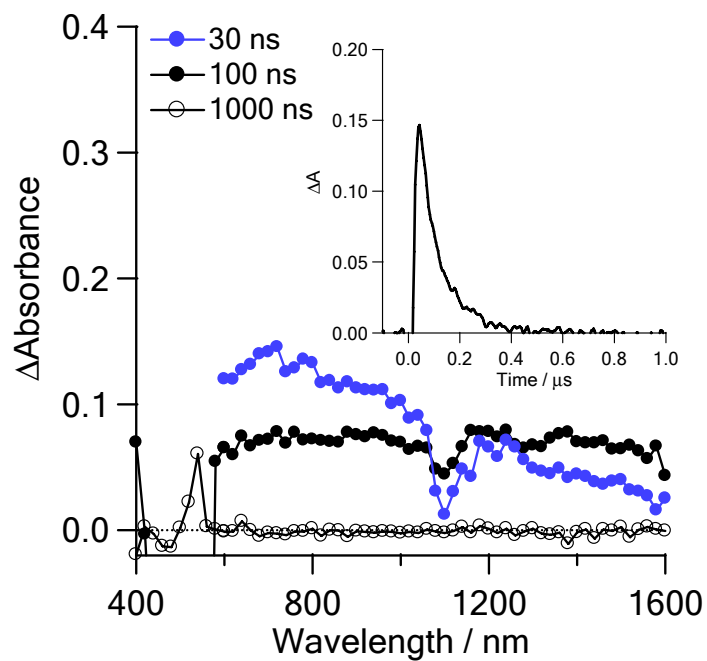

**Figure S4:** Nanosecond transient absorption spectra of nano hybrid **1** in the presence of BNAH (5mM) as observed upon 532-nm (ca. 3 mJ/ pulse) laser irradiation in deaerated  $\text{CH}_2\text{Cl}_2$ . Inset: Absorption-time profile at 750 nm (emission in the 400-600 nm disturbed the observation of the transient absorption in this region).

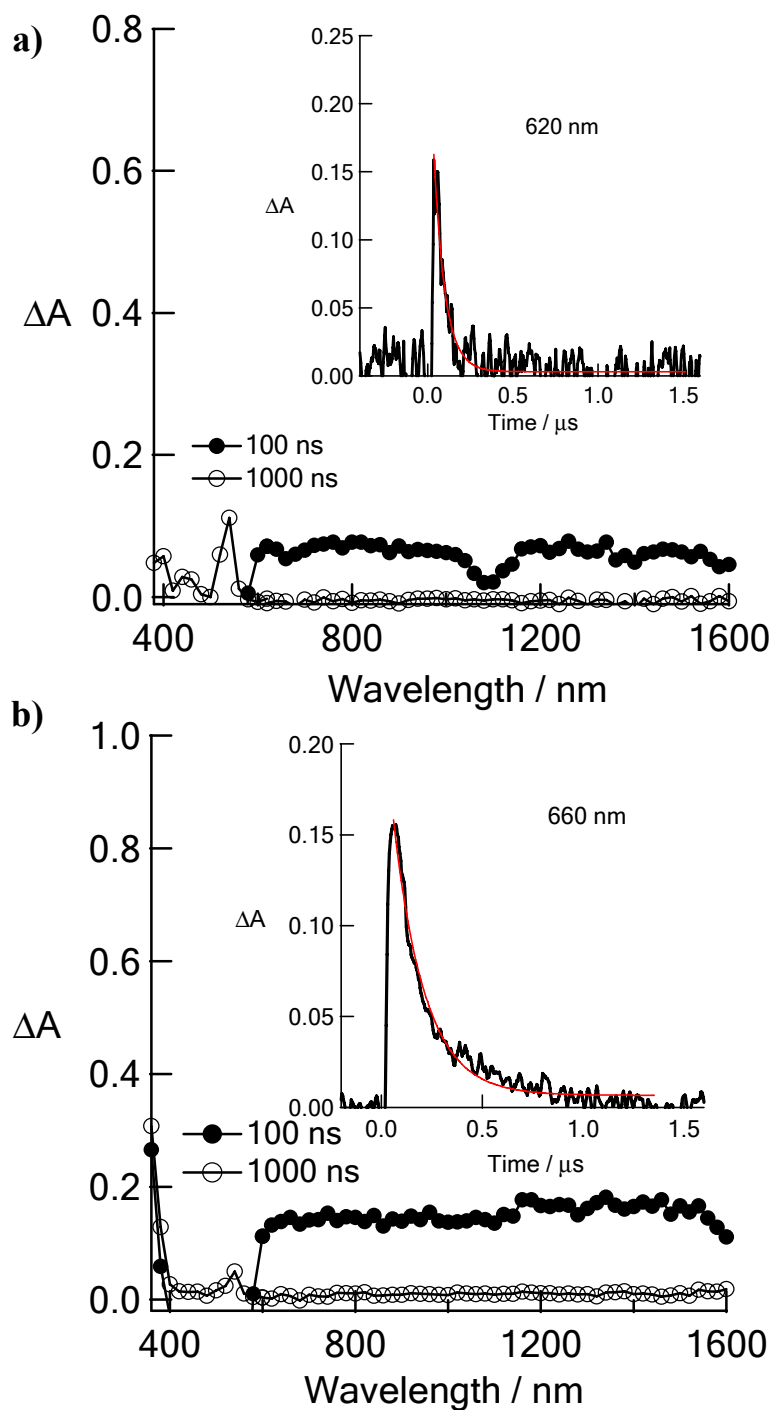

**Figure S5:** Nanosecond transient absorption spectra of nanohybrid (a) **2** and (b) **3** in the presence of BNAH (5mM) as observed upon 532-nm (ca. 3 mJ/ pulse) laser irradiation in deaerated  $\text{CH}_2\text{Cl}_2$ . Inset: Absorption-time profiles (emission in the 400-600 nm disturbed the observation of the transient absorption in this region).
